# Supplementary material for: Strategy for Designing Selective Lysosomal Acid α-Glucosidase Inhibitors: Binding Orientation and Influence on Selectivity
Source: MDPI journal article supplement (doi:10.3390/molecules25122843), 2020-06-19
Supplement: s1 [file s1]

# Supporting Information S1

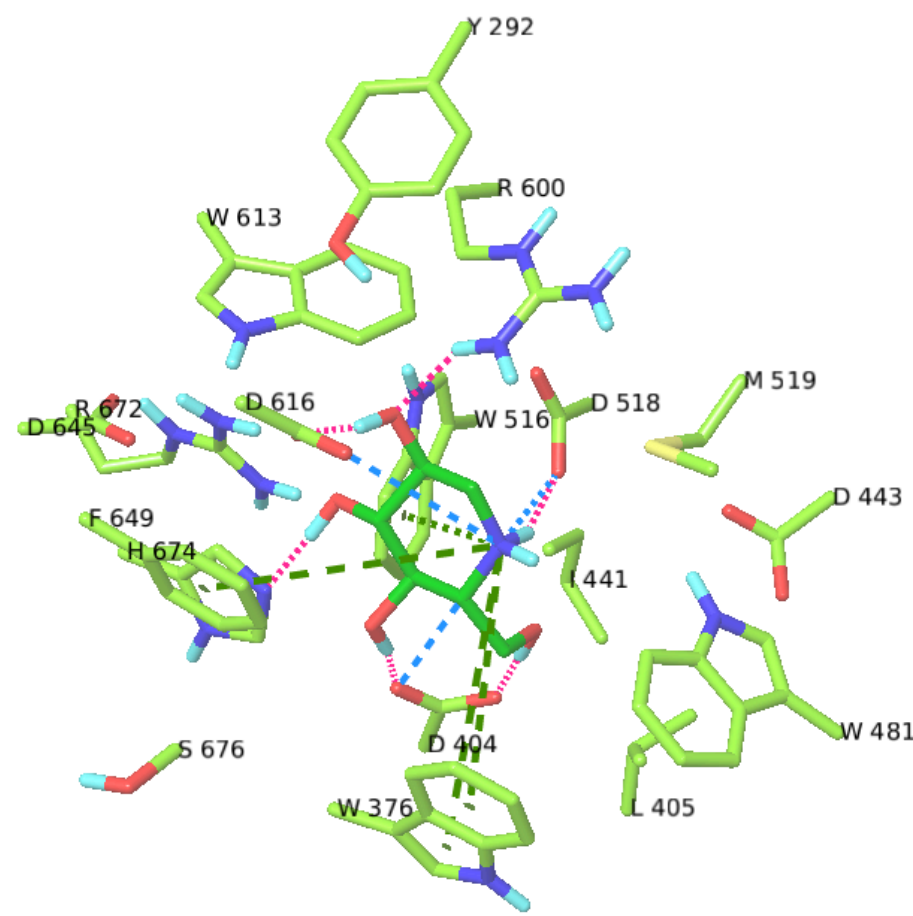

GAA (PDB ID: 5NN5)

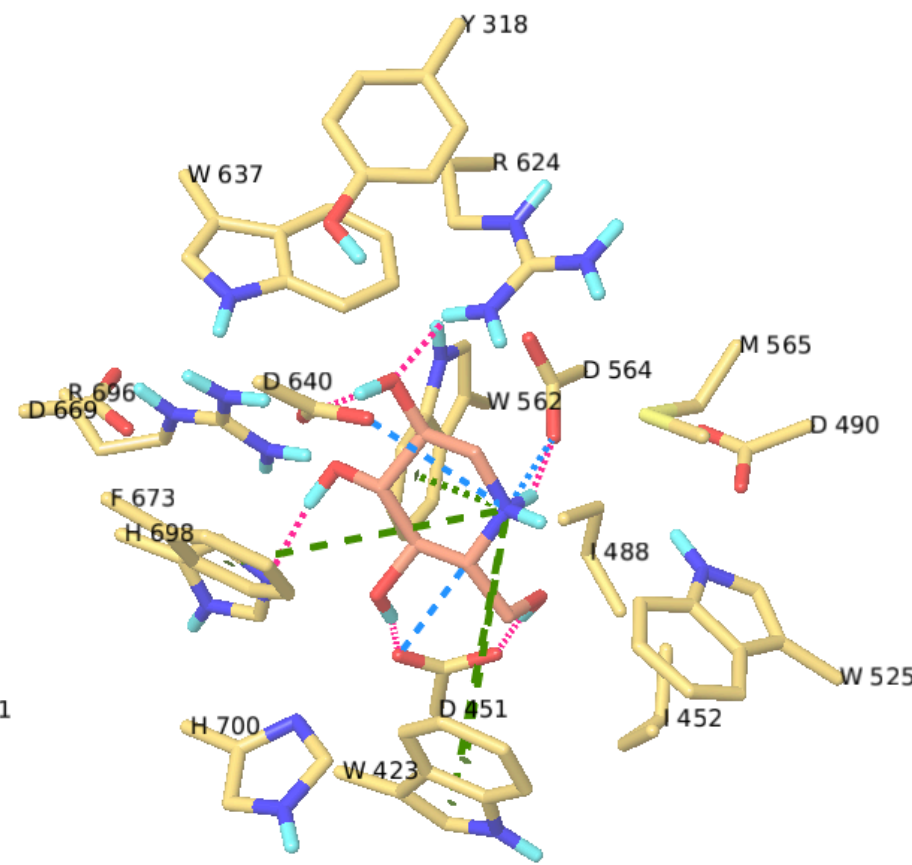

ER  $\alpha$ -glucosidases (PDB ID: 5IEE)

ligand :1-deoxynojirimycin

red dotted line: hydrogen bonds, blue dashed line: ionic, green dashed line: cation- $\pi$

## Support Info

Interactions of 1-deoxynojirimycin with GAA and ER  $\alpha$ -glucosidase.

Supporting Information S2

PDB ID: 5NN5

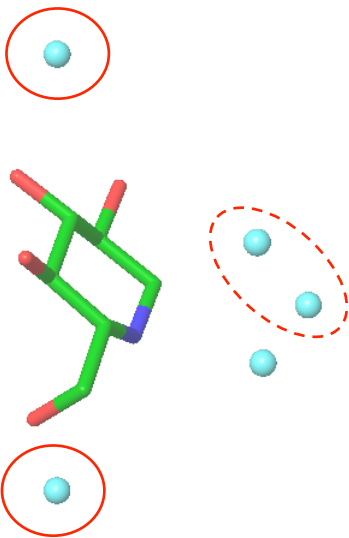

1-deoxynojirimycin

PDB ID: 5NN6

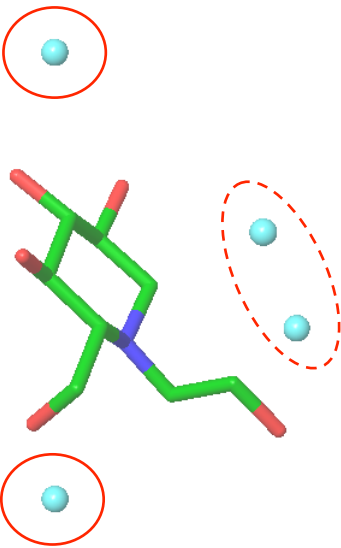

miglitol

PDB ID: 5NN8

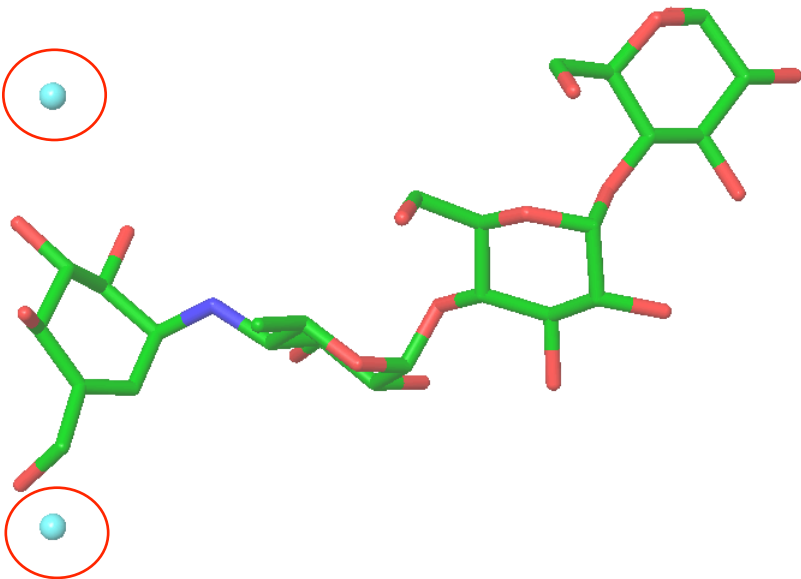

acarbose

Support Info

Water molecules found in the ligand-binding site.

The water molecules surrounded by dashed circles were used for the docking analyses.
